# Supplementary material for: 12 new susceptibility loci for prostate cancer identified by genome-wide association study in Japanese population
Source: PubMed Central journal article supplement (PMC6764957; doi:10.1038/s41467-019-12267-6), 2019-09-27
Supplement: 41467_2019_12267_MOESM1_ESM.pdf [file 41467_2019_12267_MOESM1_ESM.pdf]

## **Supplementary Information**

12 New Susceptibility Loci for Prostate Cancer Identified by Genome-wide Association Study in Japanese Population

Takata, R. *et al.*

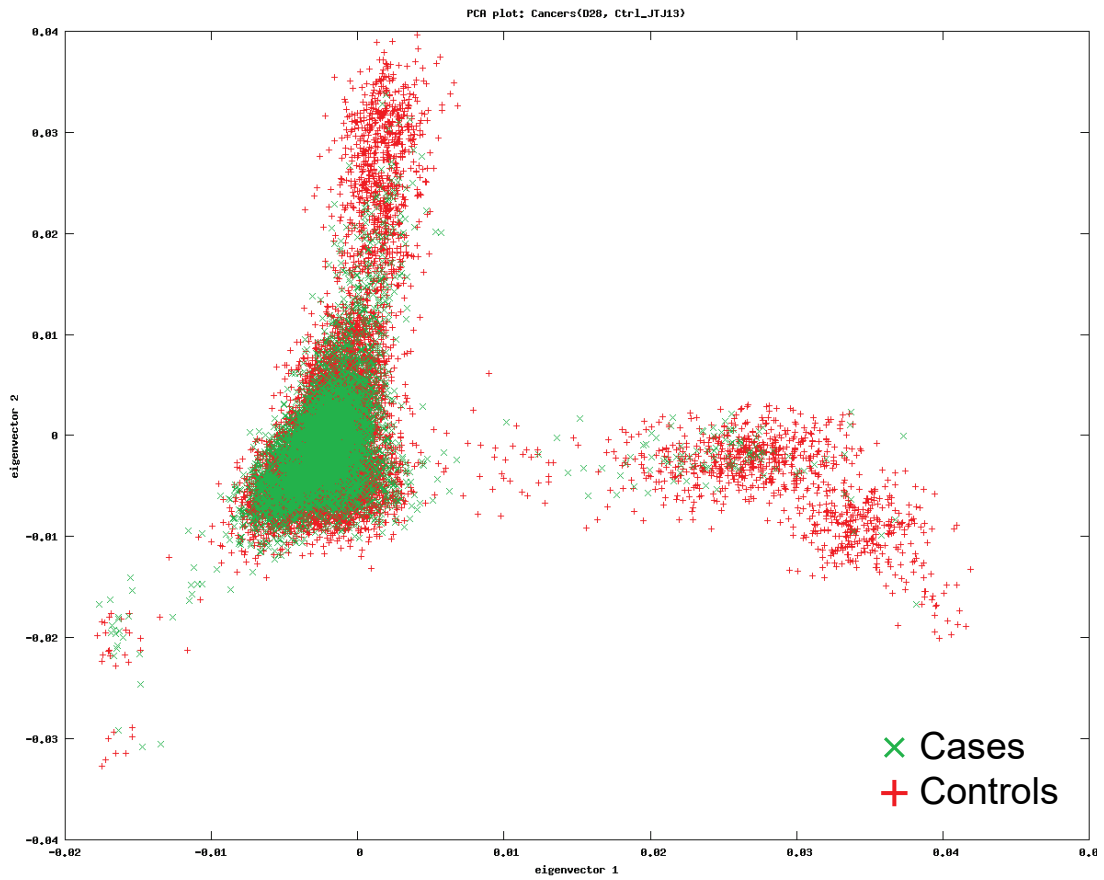

### Supplementary Figure 1

Principal component analysis plot for the Japanese populations. The individuals were plotted in a two-dimensional graph, with the first (x axis) and the second (y axis) components of the Eigenvector factors.

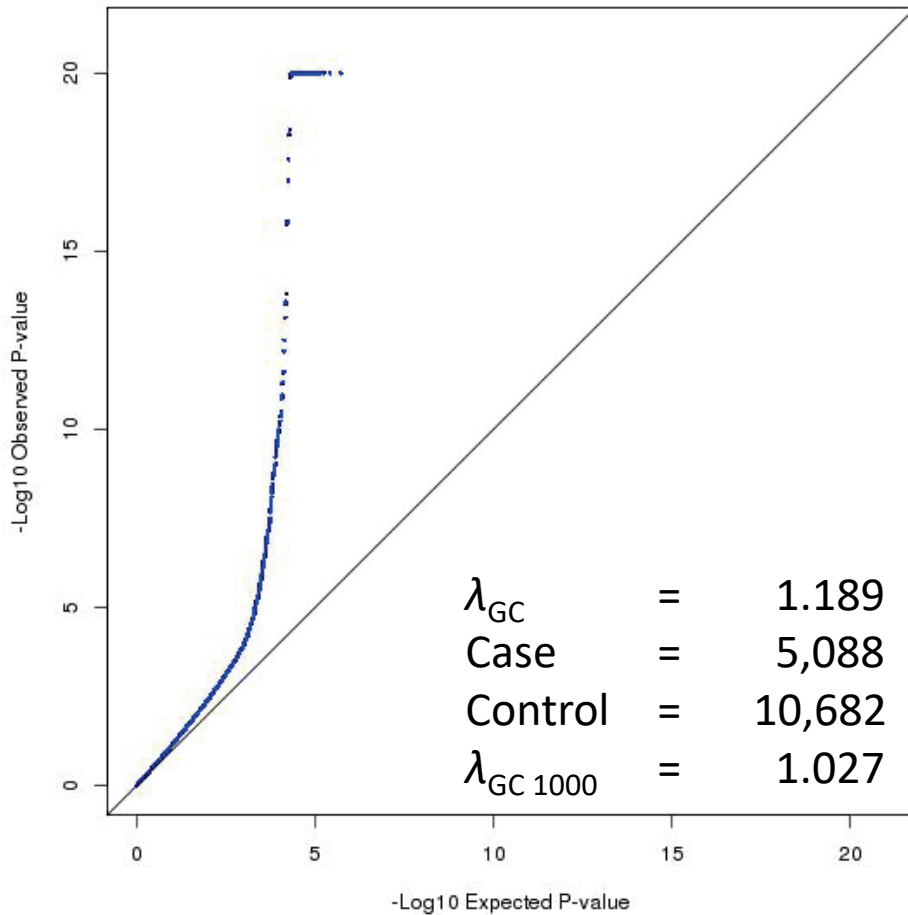

### Supplementary Figure 2

Quantile-quantile plot of GWAS  $P$ -values for genotyped and imputed SNPs. Horizontal and vertical lines represent expected  $P$  values under null distribution and observed  $P$  values, respectively. The continuous line represents the expected distribution assuming no inflation of the statistics ( $y = x$ ).  $\lambda_{GC\ 1000}$  is the inflation of association statistics that would be expected in a study of 1,000 cases and 1,000 controls.

# Supplementary Figure 3

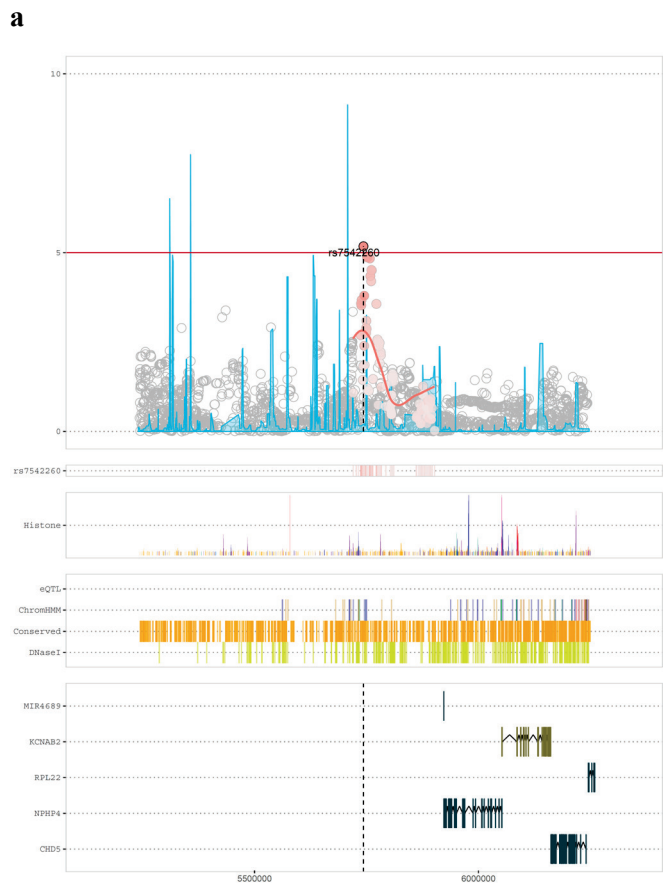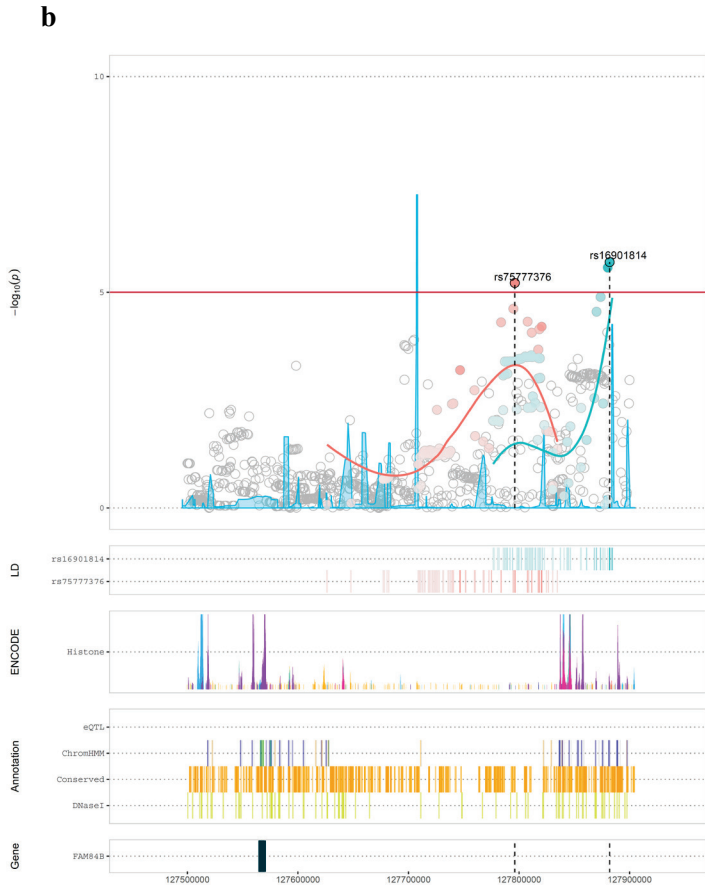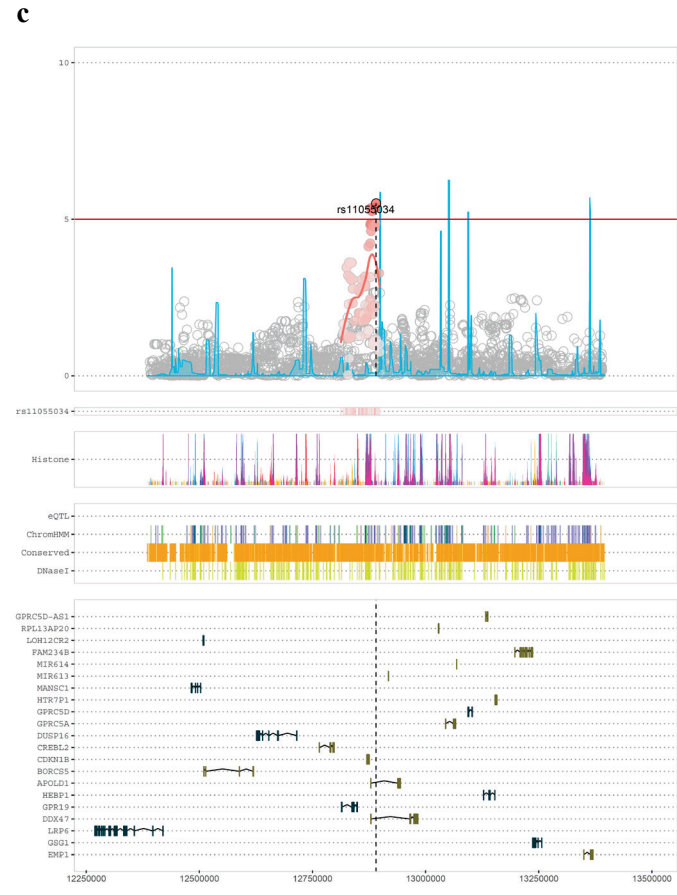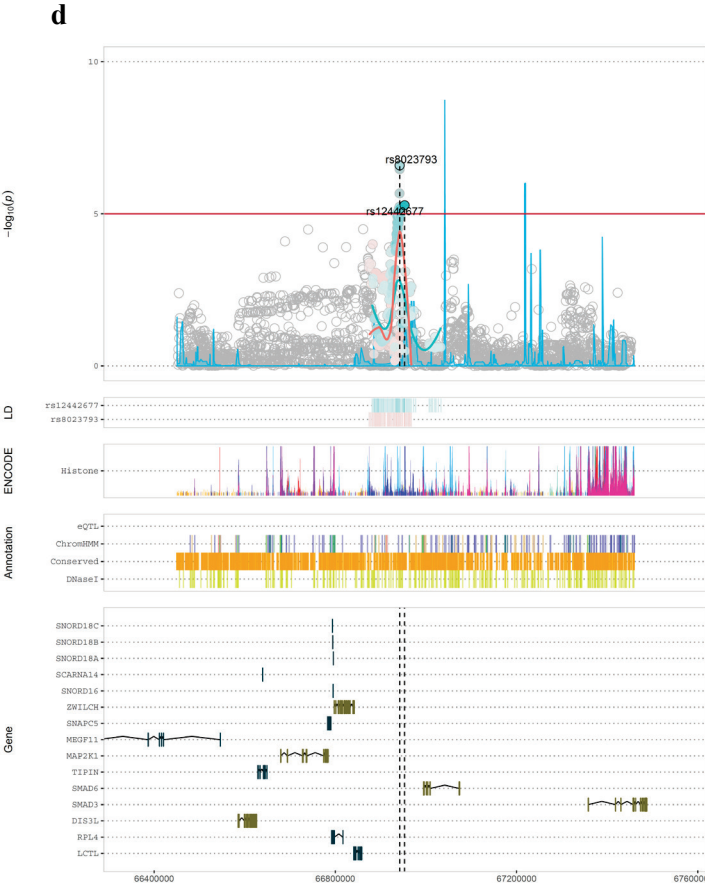

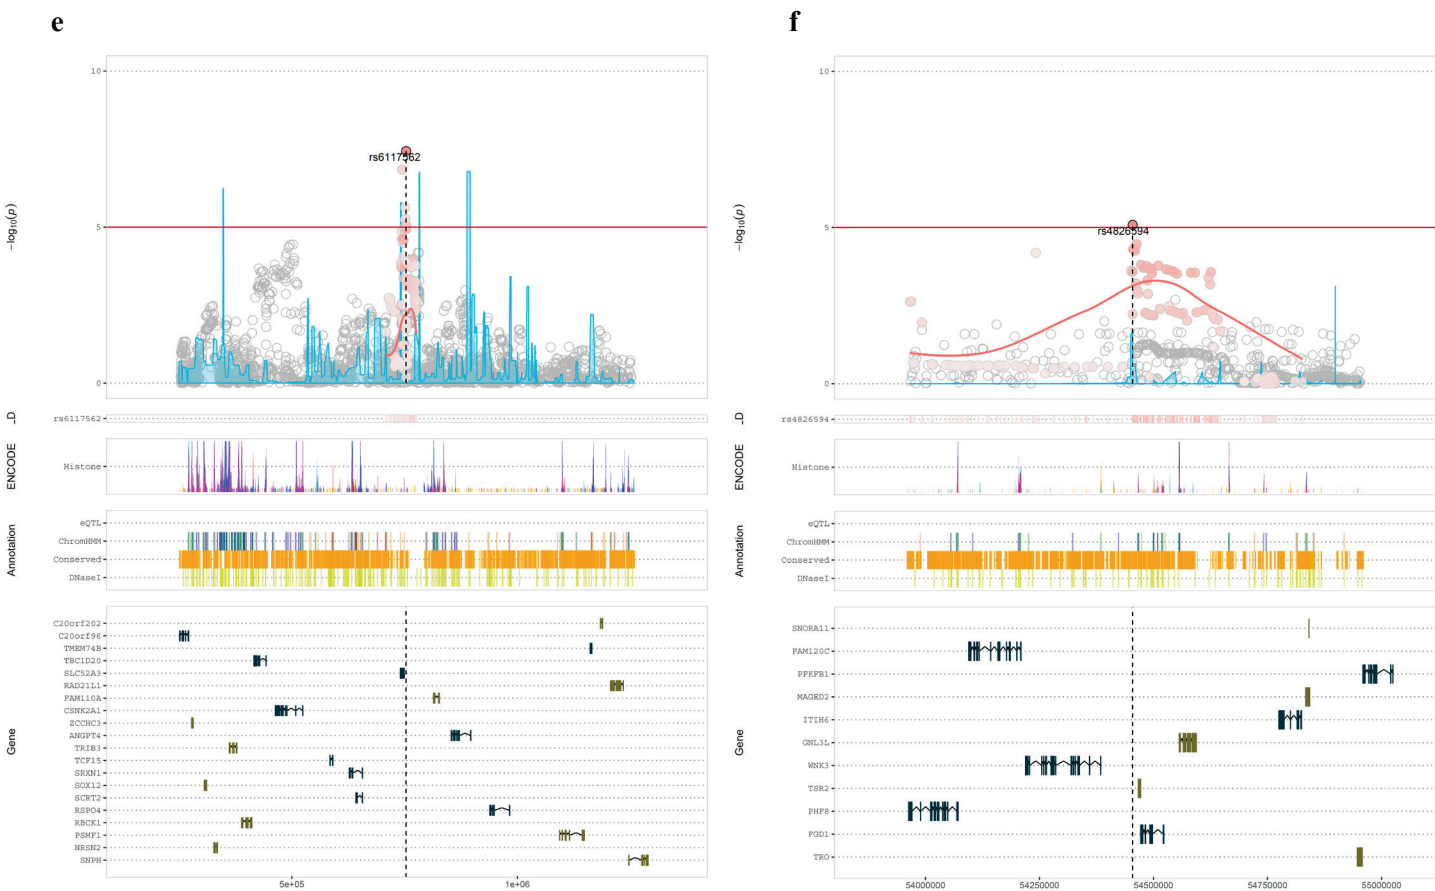

### Supplementary Figure 3

Locus Explorer plots of novel seven GWAS loci. **a** rs7542260 at chr.1. **b** rs75777376 and rs16901814 at chr.8. **c** rs11055034 at chr.12. **d** rs8023793 at chr.15. **e** rs6117562 at chr.20. **f** rs4826594 at chr.X. The regional association plot ( $-\log_{10}(P)$  panel) depicts variant  $P$ -values relative to chromosomal position. Variants in linkage disequilibrium with the novel lead SNP(s) at  $r^2 \geq 0.1$  according to the 1000 Genomes JPT population are shaded in the Manhattan plot and linkage disequilibrium track (LD panel), with darker colour denoting stronger correlation with the lead variant. Lower sections of the plot indicate the relative positions of genes and selected biological annotations. Annotations displayed are: histone modifications in ENCODE tier 1 cell lines (Histone track), the positions of variants that are eQTLs with prostate tumor expression in TCGA prostate adenocarcinoma samples (eQTL track), chromatin state categorisations in the PrEC cell-line by ChromHMM (ChromHMM track), the position of conserved element peaks (Conserved track) and the position of DNaseI hypersensitivity site peaks in ENCODE prostate cell-lines (DNaseI track). Genes on the positive and negative strand are denoted by brown and turquoise color respectively (Gene track). The horizontal axis represents genomic coordinates in the hg19 reference genome.

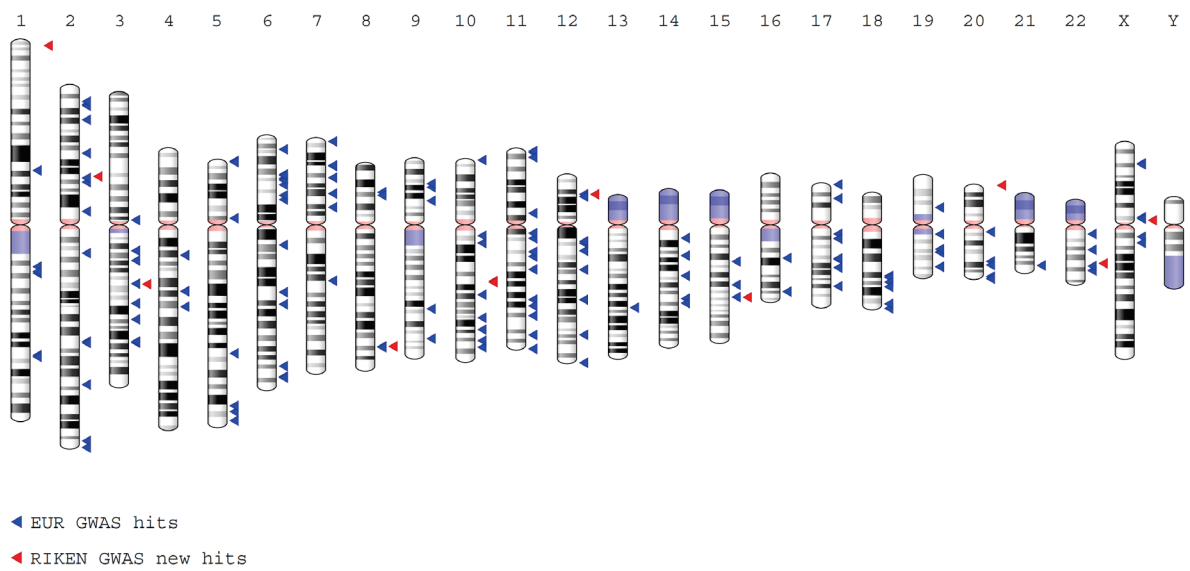

#### Supplementary Figure 4

PCa susceptibility loci identified in European GWAS and the novel loci identified in the present study. The PCa susceptibility loci reported from European GWAS (blue triangle) and the novel loci identified in the present study (red triangle) are denoted on a chromosome map.

# Supplementary Figure 5

**a**

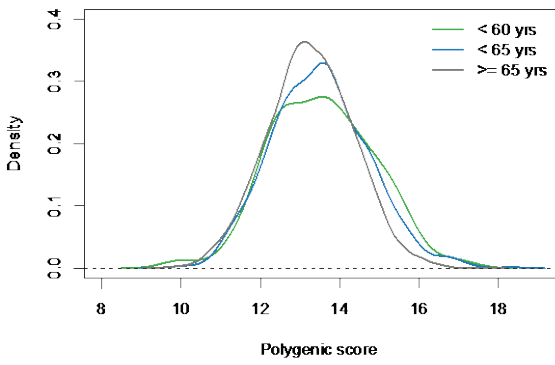

< 60 yrs vs others:  $P = 0.02395$   
< 65 yrs vs others:  $P = 3.24 \times 10^{-7}$

**b**

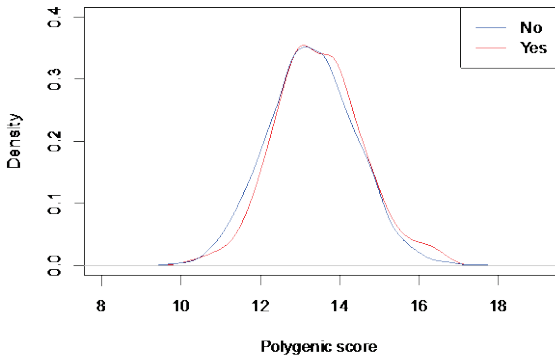

$P = 0.02395$

**c**

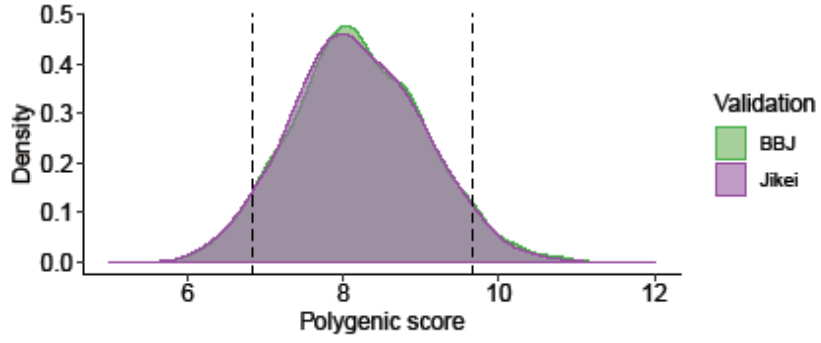

Validation  
■ BBJ  
■ Jikei

**d**

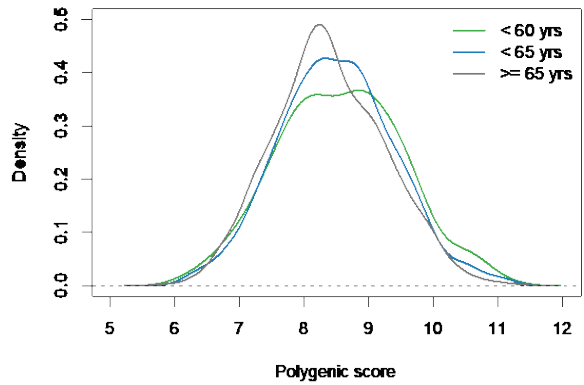

**e**

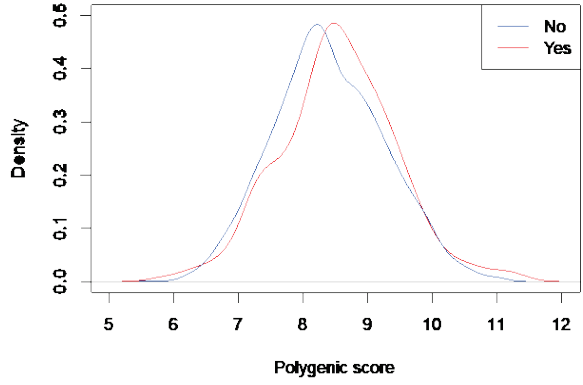

### Supplementary Figure 5

The PRS distribution for prostate cancer in Japanese population. **a** The distribution of the PRS incorporating 150 SNPs by the age at diagnosis of PCa in the GWAS cases ( $n=4,762$ ). **b** The distribution of PRS incorporating 150 SNPs by the presence of PCa family history in the GWAS cases ( $n=4,762$ ). Density was estimated using the Gaussian kernel. Green, younger than 60 years ( $n=129$ ); blue, younger than 65 years ( $n=781$ ); gray, 65 years or older ( $n=3,852$ ). **c** The PRS distribution of the PCa cases in the replication cohorts BBJ ( $n=2,368$ ) and JIKEI ( $n=2,218$ ). Density was estimated using the Gaussian kernel. The 5% higher and lower percentiles are shown as dotted lines. **d** The PRS distribution by the age at diagnosis of PCa in the BBJ cases ( $n=2,523$ ). Density was estimated using the Gaussian kernel. Green, younger than 60 years ( $n=155$ ); blue, younger than 65 years ( $n=530$ ); gray, 65 years or older ( $n=1,838$ ). **e** The PRS distribution by the presence of PCa family history in the BBJ cases ( $n=2,386$ ). Density was estimated using the Gaussian kernel. Red, positive PCa family history ( $n=232$ ); blue, negative PCa family history ( $n=2,154$ ).



**Supplementary Table 1 Clinical Characteristics of the Subjects.**

|                       |             | GWAS case (%) | BBJ replication case (%) | JIKEI case(%) | GWAS control(%) | 3BJ replication control(%) |
|-----------------------|-------------|---------------|--------------------------|---------------|-----------------|----------------------------|
| Age at diagnosis      | <50         | 3 (0.1)       | 4 (0.2)                  | 18 (0.7)      | 2701 (25.3)     | 12978 (17.7)               |
|                       | 50–54       | 33 (0.6)      | 28 (1.2)                 | 76 (2.9)      | 1434 (13.4)     | 5454 (7.4)                 |
|                       | 55–59       | 93 (1.8)      | 123 (5.2)                | 216 (8.4)     | 1904 (17.8)     | 9049 (12.4)                |
|                       | 60–64       | 652 (12.8)    | 375 (15.7)               | 492 (19.1)    | 1923 (18.0)     | 10354 (14.1)               |
|                       | 65–69       | 1075 (21.1)   | 542 (22.7)               | 596 (23.1)    | 2025 (19.0)     | 11235 (15.3)               |
|                       | 70–74       | 1342 (26.4)   | 649 (27.2)               | 558 (21.6)    | 646 (6.0)       | 11069 (15.1)               |
|                       | 75–79       | 917 (18.0)    | 429 (18.0)               | 233 (9.0)     | 48 (0.4)        | 7876 (10.8)                |
|                       | 80–84       | 385 (7.6)     | 172 (7.2)                | 25 (1.0)      | 1 (0.0)         | 3676 (5.0)                 |
|                       | 85–89       | 115 (2.3)     | 42 (1.8)                 | 3 (0.1)       | 0 (0.0)         | 1223 (1.7)                 |
|                       | 90+         | 18 (0.4)      | 4 (0.2)                  | 1 (0.0)       | 0 (0.0)         | 303 (0.4)                  |
|                       | N.A.        | 455 (8.9)     | 18 (0.8)                 | 364 (14.1)    | 0 (0.0)         | 44 (0.0)                   |
|                       | Mean ± S.D. | 71.2 ± 6.8    | 70.2 ± 7.1               | 66.7 ± 6.7    | 56.6 ± 9.9      | 61.8 ± 14.3                |
| Family history of PCa | Yes         | 272 (5.3)     | 232 (9.7)                | 0 (0.0)       |                 |                            |
|                       | No          | 4621 (90.8)   | 2154 (90.3)              | 0 (0.0)       |                 |                            |
|                       | N.A.        | 195 (3.8)     | 0 (0.0)                  | 2582 (100.0)  |                 |                            |
| PSA (ng/mL)           | ≤4          | 131 (2.6)     | 29 (1.2)                 | 67 (2.6)      |                 |                            |
|                       | 4–10        | 869 (17.1)    | 1061 (44.5)              | 1371 (53.1)   |                 |                            |
|                       | 10–20       | 510 (10.0)    | 563 (23.6)               | 530 (20.5)    |                 |                            |
|                       | >20         | 709 (13.9)    | 678 (28.4)               | 243 (9.4)     |                 |                            |
|                       | N.A.        | 2869 (56.4)   | 55 (2.3)                 | 371 (14.4)    |                 |                            |
| T stage               | T0          | 9 (0.2)       | 0 (0.0)                  | 3 (0.1)       |                 |                            |
|                       | T1          | 516 (10.1)    | 519 (21.8)               | 930 (36.0)    |                 |                            |
|                       | T2          | 792 (15.6)    | 941 (39.4)               | 758 (29.4)    |                 |                            |
|                       | T3          | 406 (8.0)     | 324 (13.6)               | 414 (16.0)    |                 |                            |
|                       | T4          | 88 (1.7)      | 74 (3.1)                 | 10 (0.4)      |                 |                            |
|                       | N.A.        | 3277 (64.4)   | 528 (22.1)               | 467 (18.1)    |                 |                            |
| N stage               | N0          | 1636 (32.2)   | 1717 (72.0)              | 0 (0.0)       |                 |                            |
|                       | N1          | 94 (1.8)      | 122 (5.1)                | 0 (0.0)       |                 |                            |
|                       | N.A.        | 3358 (66.0)   | 547 (22.9)               | 2582 (100.0)  |                 |                            |
| M stage               | M0          | 1582 (31.1)   | 1663 (69.7)              | 0 (0.0)       |                 |                            |
|                       | M1          | 125 (2.5)     | 146 (6.1)                | 0 (0.0)       |                 |                            |
|                       | N.A.        | 3381 (66.5)   | 577 (24.2)               | 2582 (100.0)  |                 |                            |
| Gleason Score         | ≤6          | 1293 (25.4)   | 672 (28.2)               | 609 (23.6)    |                 |                            |
|                       | 7           | 1109 (21.8)   | 800 (33.5)               | 1188 (46.0)   |                 |                            |
|                       | ≥8          | 880 (17.3)    | 736 (30.8)               | 412 (16.0)    |                 |                            |
|                       | N.A.        | 1806 (35.5)   | 178 (7.5)                | 373 (14.4)    |                 |                            |

**Supplementary Table 2 101 SNPs analyzed for the replication study**

| SNP ID         | Chr | Position  | Effect Allele | NonEffect Allele | Case Frequency | Control Frequency | RSQR <sup>a</sup> | OR <sup>b</sup> | P-value   | Nearby genes |
|----------------|-----|-----------|---------------|------------------|----------------|-------------------|-------------------|-----------------|-----------|--------------|
| rs7542260      | 1   | 5743196   | C             | T                | 0.892          | 0.910             | 0.980             | 0.832           | 6.64.E-06 | MIR4417      |
| rs75577813     | 1   | 31176551  | T             | A                | 0.844          | 0.827             | 0.770             | 1.194           | 3.13.E-06 | MATN1        |
| rs1149035      | 1   | 31178783  | C             | T                | 0.712          | 0.687             | 0.996             | 1.138           | 1.38.E-06 | MATN1        |
| rs1149036      | 1   | 31179677  | C             | T                | 0.539          | 0.512             | 0.993             | 1.126           | 1.34.E-06 | MATN1        |
| rs17127969     | 1   | 66220441  | G             | C                | 0.895          | 0.879             | 0.599             | 1.259           | 5.91.E-06 | PDE4B        |
| rs77631267     | 1   | 96451709  | T             | C                | 0.972          | 0.979             | 0.611             | 0.640           | 4.73.E-06 | UBE2WP1      |
| rs680823       | 1   | 110848727 | C             | G                | 0.708          | 0.681             | 0.998             | 1.127           | 6.31.E-06 | LOC440600    |
| rs10200833     | 2   | 43673316  | G             | C                | 0.712          | 0.675             | 0.950             | 1.177           | 2.12.E-09 | THADA        |
| rs6544670      | 2   | 43771237  | T             | A                | 0.897          | 0.886             | 0.366             | 1.357           | 4.14.E-06 | THADA        |
| rs11676567     | 2   | 62733253  | T             | C                | 0.612          | 0.643             | 0.953             | 0.869           | 5.17.E-08 | TMEM17       |
| rs12622031     | 2   | 62741388  | C             | A                | 0.661          | 0.697             | 0.977             | 0.865           | 3.65.E-08 | RPL37P13     |
| rs11125927     | 2   | 62752975  | A             | G                | 0.738          | 0.774             | 0.980             | 0.837           | 4.74.E-10 | RPL21P37     |
| rs58235267     | 2   | 63277843  | G             | C                | 0.738          | 0.716             | 0.901             | 1.143           | 4.11.E-06 | OTX1         |
| rs11890276     | 2   | 63366191  | T             | C                | 0.744          | 0.719             | 0.994             | 1.149           | 5.91.E-07 | WDPCP        |
| rs114780236    | 2   | 63789049  | G             | A                | 0.848          | 0.826             | 0.989             | 1.166           | 5.49.E-06 | WDPCP        |
| rs72806089     | 2   | 63906145  | A             | T                | 0.836          | 0.815             | 0.915             | 1.166           | 6.84.E-06 | RPL27P6      |
| rs79600468     | 2   | 150358312 | T             | C                | 0.814          | 0.831             | 0.641             | 0.833           | 3.02.E-06 | LYPD6        |
| rs10469655     | 2   | 150411229 | A             | T                | 0.878          | 0.896             | 0.948             | 0.829           | 1.51.E-06 | MMADHC       |
| rs838437       | 2   | 232580258 | C             | T                | 0.625          | 0.654             | 0.977             | 0.890           | 5.43.E-06 | PTMA         |
| rs55702004     | 3   | 25398113  | A             | G                | 0.899          | 0.884             | 0.689             | 1.267           | 9.63.E-07 | LOC100505947 |
| rs80041270     | 3   | 86634986  | A             | G                | 0.869          | 0.841             | 0.725             | 1.253           | 6.98.E-08 | VGLL3        |
| rs73205316     | 3   | 127592030 | G             | A                | 0.837          | 0.852             | 0.610             | 0.827           | 5.94.E-06 | KBTBD12      |
| rs2878602      | 3   | 127709698 | C             | T                | 0.634          | 0.663             | 0.955             | 0.881           | 1.13.E-06 | KBTBD12      |
| rs146054659    | 3   | 127777865 | A             | C                | 0.981          | 0.985             | 0.332             | 0.493           | 8.62.E-06 | SEC61A1      |
| rs62270939     | 3   | 128189071 | C             | G                | 0.972          | 0.983             | 0.699             | 0.527           | 1.29.E-11 | DNAI18-AS1   |
| rs2659689      | 3   | 128203006 | T             | G                | 0.490          | 0.516             | 0.973             | 0.874           | 5.78.E-08 | GATA2        |
| rs73862213     | 3   | 128217499 | A             | G                | 0.908          | 0.929             | 0.996             | 0.754           | 1.71.E-10 | LOC100506995 |
| chr3_128292393 | 3   | 128292393 | G             | A                | 0.971          | 0.977             | 0.378             | 0.531           | 9.26.E-08 | C3orf27      |
| rs9877767      | 3   | 128492372 | C             | T                | 0.979          | 0.985             | 0.397             | 0.469           | 1.92.E-08 | RAB7A        |
| rs62269375     | 3   | 145469759 | T             | C                | 0.918          | 0.903             | 0.989             | 1.214           | 9.28.E-06 | GM2AP1       |
| rs9684980      | 4   | 58386872  | T             | C                | 0.926          | 0.915             | 0.424             | 1.428           | 4.95.E-07 | RPS26P24     |
| rs79913506     | 4   | 58463352  | A             | G                | 0.982          | 0.978             | 0.324             | 2.086           | 6.59.E-06 | RPS26P24     |
| rs184519554    | 4   | 58487183  | G             | C                | 0.887          | 0.874             | 0.579             | 1.262           | 3.73.E-06 | RPS26P24     |
| rs28479946     | 4   | 95596744  | A             | T                | 0.744          | 0.771             | 0.863             | 0.872           | 7.58.E-06 | PDLIM5       |
| rs140589300    | 4   | 134260340 | G             | A                | 0.952          | 0.938             | 0.680             | 1.352           | 6.99.E-06 | PCDH10       |
| rs138819533    | 4   | 134599768 | G             | A                | 0.962          | 0.952             | 0.437             | 1.578           | 1.96.E-06 | PCDH10       |
| rs72804215     | 5   | 123404120 | T             | G                | 0.847          | 0.869             | 0.821             | 0.839           | 3.69.E-06 | KRT18P16     |
| rs117276599    | 6   | 21313499  | C             | T                | 0.930          | 0.941             | 0.575             | 0.751           | 8.10.E-06 | CDKAL1       |
| rs241819       | 6   | 100910798 | G             | A                | 0.594          | 0.618             | 1.000             | 0.894           | 6.83.E-06 | SIM1         |
| rs79736035     | 6   | 117372016 | C             | T                | 0.851          | 0.863             | 0.359             | 0.754           | 1.29.E-06 | RPS29P13     |
| rs553058       | 6   | 117374977 | T             | A                | 0.451          | 0.485             | 0.952             | 0.875           | 1.04.E-07 | RPS29P13     |
| rs188059637    | 6   | 136003357 | A             | T                | 0.963          | 0.951             | 0.986             | 1.320           | 9.10.E-06 | LINC00271    |
| rs10232385     | 7   | 21185228  | T             | C                | 0.703          | 0.676             | 0.999             | 1.128           | 5.27.E-06 | ASS1P11      |
| rs76282104     | 7   | 25894349  | G             | T                | 0.989          | 0.983             | 0.851             | 1.722           | 8.44.E-06 | LOC100506236 |
| rs13246464     | 7   | 27684029  | C             | G                | 0.903          | 0.917             | 0.754             | 0.800           | 4.77.E-06 | HIBADH       |
| rs150873210    | 7   | 124180638 | A             | C                | 0.943          | 0.951             | 0.982             | 0.784           | 8.02.E-06 | RPS2P31      |
| rs62481516     | 7   | 124207578 | T             | C                | 0.943          | 0.951             | 0.991             | 0.786           | 8.20.E-06 | RPS2P31      |
| rs62478329     | 7   | 124314512 | C             | T                | 0.942          | 0.950             | 0.941             | 0.778           | 4.58.E-06 | GPR37        |
| rs73443807     | 7   | 124347349 | T             | C                | 0.941          | 0.949             | 0.981             | 0.786           | 5.72.E-06 | GPR37        |
| rs35633617     | 7   | 150675562 | A             | G                | 0.880          | 0.861             | 0.998             | 1.181           | 6.38.E-06 | KCNH2        |
| rs141301022    | 8   | 23276085  | G             | A                | 0.951          | 0.960             | 0.730             | 0.686           | 4.70.E-08 | ENTPD4       |
| rs181545207    | 8   | 24329446  | T             | C                | 0.958          | 0.949             | 0.752             | 1.361           | 9.13.E-06 | ADAM7        |
| rs75777376     | 8   | 127796183 | T             | C                | 0.896          | 0.908             | 0.528             | 0.779           | 6.08.E-06 | FAM84B       |
| rs16901814     | 8   | 127881952 | G             | A                | 0.854          | 0.833             | 0.993             | 1.176           | 2.00.E-06 | SRRM1P1      |
| rs12341053     | 9   | 31095621  | T             | C                | 0.799          | 0.780             | 0.989             | 1.146           | 6.51.E-06 | LOC100533658 |
| rs190296145    | 9   | 101773862 | A             | G                | 0.628          | 0.607             | 0.980             | 1.119           | 8.43.E-06 | COL15A1      |
| rs4837088      | 9   | 129223653 | T             | A                | 0.893          | 0.906             | 0.800             | 0.817           | 5.98.E-06 | FAM125B      |
| rs150059818    | 10  | 80254699  | G             | A                | 0.850          | 0.831             | 0.818             | 1.204           | 5.53.E-07 | LOC100132987 |
| rs56231799     | 10  | 80258348  | T             | C                | 0.792          | 0.766             | 0.965             | 1.180           | 4.49.E-08 | LOC100132987 |
| rs77911174     | 10  | 80826833  | A             | G                | 0.604          | 0.643             | 0.957             | 0.853           | 6.14.E-10 | LOC283050    |
| rs11196775     | 10  | 116279023 | T             | G                | 0.800          | 0.826             | 0.990             | 0.870           | 7.61.E-06 | ABLIM1       |
| rs11199697     | 10  | 122758389 | A             | C                | 0.831          | 0.854             | 1.000             | 0.859           | 4.83.E-06 | WDR11        |
| rs142721250    | 11  | 21513536  | A             | G                | 0.973          | 0.980             | 0.652             | 0.632           | 1.39.E-06 | NELL1        |
| rs116924860    | 11  | 27614016  | G             | A                | 0.982          | 0.987             | 0.538             | 0.542           | 5.04.E-06 | BDNF-AS1     |
| rs3812767      | 11  | 36293835  | C             | G                | 0.639          | 0.663             | 0.997             | 0.888           | 3.56.E-06 | COMMD9       |
| rs144783953    | 11  | 36308881  | A             | G                | 0.556          | 0.532             | 0.868             | 1.137           | 9.97.E-07 | COMMD9       |
| rs1900337      | 11  | 36357037  | A             | G                | 0.861          | 0.841             | 1.000             | 1.170           | 6.44.E-06 | PRR5L        |
| rs149911096    | 11  | 58816706  | G             | C                | 0.853          | 0.870             | 0.624             | 0.809           | 2.08.E-06 | LOC283194    |
| rs10735041     | 12  | 5013308   | A             | G                | 0.701          | 0.663             | 0.973             | 1.153           | 1.02.E-07 | KCNA1        |
| rs12228019     | 12  | 5013456   | C             | A                | 0.764          | 0.735             | 0.961             | 1.159           | 3.37.E-07 | KCNA1        |
| rs993018       | 12  | 5037942   | A             | G                | 0.904          | 0.890             | 0.823             | 1.222           | 7.66.E-06 | KCNA1        |
| rs2855712      | 12  | 12031894  | C             | G                | 0.580          | 0.603             | 0.836             | 0.877           | 1.38.E-06 | ETV6         |
| rs11055034     | 12  | 12890626  | C             | A                | 0.601          | 0.577             | 0.999             | 1.123           | 3.11.E-06 | APOLD1       |

|             |    |          |   |   |       |       |       |       |           |              |
|-------------|----|----------|---|---|-------|-------|-------|-------|-----------|--------------|
| rs187245946 | 12 | 53229473 | C | T | 0.976 | 0.983 | 0.448 | 0.540 | 2.95.E-07 | KRT79        |
| rs142025399 | 12 | 53315665 | C | T | 0.962 | 0.973 | 0.603 | 0.585 | 2.80.E-10 | KRT8         |
| rs795401    | 12 | 61389065 | A | C | 0.737 | 0.711 | 0.852 | 1.154 | 1.80.E-06 | PGBD3P1      |
| rs145628451 | 12 | 61398726 | A | C | 0.582 | 0.557 | 0.850 | 1.128 | 7.27.E-06 | PGBD3P1      |
| rs4842687   | 12 | 90156377 | A | G | 0.740 | 0.721 | 0.835 | 1.144 | 7.98.E-06 | MRPL2P1      |
| rs57298504  | 12 | 97889116 | C | T | 0.887 | 0.868 | 0.985 | 1.183 | 9.86.E-06 | RMST         |
| rs74648385  | 13 | 51225503 | C | T | 0.961 | 0.963 | 0.498 | 0.663 | 8.15.E-06 | DLEU7        |
| rs35366543  | 14 | 62869613 | G | A | 0.823 | 0.840 | 0.939 | 0.860 | 6.39.E-06 | LOC100129782 |
| rs7169790   | 15 | 43671639 | T | A | 0.639 | 0.622 | 0.843 | 1.134 | 4.66.E-06 | TUBGCP4      |
| rs8023793   | 15 | 66942093 | A | C | 0.595 | 0.559 | 0.997 | 1.137 | 2.56.E-07 | SMAD6        |
| rs12442677  | 15 | 66952824 | C | T | 0.805 | 0.775 | 0.864 | 1.160 | 5.22.E-06 | SMAD6        |
| rs237342    | 17 | 12428982 | G | A | 0.592 | 0.616 | 0.640 | 0.872 | 9.13.E-06 | FLJ34690     |
| rs12150178  | 17 | 36543271 | G | A | 0.843 | 0.826 | 0.349 | 1.301 | 3.40.E-06 | SOCS7        |
| rs8067707   | 17 | 36570808 | A | G | 0.798 | 0.770 | 0.888 | 1.161 | 2.61.E-06 | SOCS7        |
| rs7247729   | 19 | 19837946 | A | G | 0.702 | 0.680 | 0.813 | 1.142 | 6.31.E-06 | ZNF14        |
| rs3746804   | 20 | 744415   | G | A | 0.697 | 0.669 | 1.000 | 1.149 | 1.44.E-07 | C20orf54     |
| rs58279463  | 20 | 750499   | C | A | 0.790 | 0.770 | 0.973 | 1.153 | 2.35.E-06 | C20orf54     |
| rs6117562   | 20 | 753310   | G | A | 0.485 | 0.516 | 0.989 | 0.874 | 3.64.E-08 | C20orf54     |
| rs55682426  | 20 | 9800385  | A | G | 0.670 | 0.696 | 0.998 | 0.877 | 5.60.E-07 | PAK7         |
| rs761227    | 20 | 9806004  | T | C | 0.587 | 0.613 | 0.950 | 0.886 | 2.29.E-06 | PAK7         |
| rs2253231   | 21 | 16352281 | C | T | 0.591 | 0.555 | 1.000 | 1.152 | 1.24.E-08 | NRIP1        |
| rs1997577   | 21 | 16371102 | A | T | 0.651 | 0.619 | 0.978 | 1.156 | 1.89.E-08 | NRIP1        |
| rs7282769   | 21 | 16381531 | A | G | 0.706 | 0.679 | 0.984 | 1.143 | 6.03.E-07 | NRIP1        |
| rs34567417  | 22 | 37257177 | G | A | 0.935 | 0.948 | 0.886 | 0.772 | 1.82.E-06 | NCF4         |
| rs138426    | 22 | 38871891 | A | G | 0.717 | 0.694 | 0.746 | 1.148 | 9.32.E-06 | KDEL3        |
| rs117693861 | 22 | 38993476 | A | G | 0.966 | 0.958 | 0.378 | 1.687 | 1.20.E-06 | LOC646851    |
| rs138708    | 22 | 39138332 | G | A | 0.855 | 0.831 | 0.983 | 1.172 | 3.74.E-06 | SUN2         |
| rs4826594   | X  | 54454406 | G | A | 0.482 | 0.525 | 0.967 | 0.924 | 8.21.E-06 | TSR2         |

<sup>a</sup>RSQR, imputation accuracy. SNPs were imputed in the GWAS.

<sup>b</sup>Non effect alleles were considered as reference.

**Supplementary Table 3 eQTL analysis indicated four SNPs were associated with expression of nearby genes**

| SNP        | Gene name        | variant_id          | tss_distance <sup>a</sup> | pval_nominal <sup>b</sup> | slope <sup>c</sup> | slope_se <sup>d</sup> |
|------------|------------------|---------------------|---------------------------|---------------------------|--------------------|-----------------------|
| rs16901814 | <i>FAM84B</i>    | 8_127881952_G_A_b37 | 311314                    | 2.04.E-02                 | 0.433              | 0.182                 |
| rs4554825  | <i>ZMIZ1-AS1</i> | 10_80244623_C_T_b37 | -583029                   | 3.61.E-02                 | 0.408              | 0.191                 |
| rs6117562  | <i>CSNK2A1</i>   | 20_753310_G_A_b37   | 228845                    | 2.76.E-02                 | 0.269              | 0.119                 |
| rs6117562  | <i>FAM110A</i>   | 20_753310_G_A_b37   | -61048                    | 1.04.E-02                 | 0.176              | 0.067                 |

<sup>a</sup>Distance between variant and transcription start site.

<sup>b</sup>Nominal p-value associated with the variant for this gene.

<sup>c</sup>Regression slope.

<sup>d</sup>Standard error of the regression slope.

**Supplementary Table 4 Allele frequency of the 12 novel SNPs in European and Japanese population**

| SNP ID     | 1000 Genomes   |                |                |                | Hapmap         |                |                |               |
|------------|----------------|----------------|----------------|----------------|----------------|----------------|----------------|---------------|
|            | European       |                | Japanese       |                | European       |                | Japanese       |               |
| rs7542260  | C: 0.955 (189) | T: 0.045 (9)   | C: 0.856 (178) | T: 0.144 (30)  | C: 0.947 (108) | T: 0.053 (6)   | C: 0.845 (71)  | T: 0.155 (13) |
| rs11125927 | G: 0.111 (22)  | A: 0.889 (176) | G: 0.245 (51)  | A: 0.755 (157) | G: 0.100 (12)  | A: 0.900 (108) | G: 0.233 (21)  | A: 0.767 (69) |
| rs73862213 | A: 0.924 (183) | G: 0.076 (15)  | A: 0.904 (188) | G: 0.096 (20)  |                |                |                |               |
| rs75777376 | T: 0.995 (197) | C: 0.005       | T: 0.894 (186) | C: 0.106 (22)  |                |                |                |               |
| rs16901814 | G: 0.854 (169) | A: 0.146 (29)  | G: 0.803 (167) | A: 0.197 (41)  | G: 0.858 (194) | A: 0.142 (32)  | G: 0.814 (140) | A: 0.186 (32) |
| rs4554825  | C: 0.944 (187) | T: 0.056 (11)  | C: 0.774 (161) | T: 0.226 (47)  | C: 0.924 (109) | T: 0.076 (9)   | C: 0.767 (69)  | T: 0.233 (21) |
| rs77911174 | A: 0.904 (179) | G: 0.096 (19)  | A: 0.644 (134) | G: 0.356 (74)  |                |                |                |               |
| rs11055034 | C: 0.712 (141) | A: 0.288 (57)  | C: 0.529 (110) | A: 0.471 (98)  | C: 0.704 (159) | A: 0.296 (67)  | C: 0.530 (89)  | A: 0.470 (79) |
| rs8023793  | C: 0.470 (93)  | A: 0.530 (105) | C: 0.404 (84)  | A: 0.596 (124) |                |                |                |               |
| rs6117562  | G: 0.773 (153) | A: 0.227 (45)  | G: 0.587 (122) | A: 0.413 (86)  | G: 0.788 (178) | A: 0.212 (48)  | G: 0.599 (103) | A: 0.401 (69) |
| rs138708   | G: 0.985 (195) | A: 0.015 (3)   | G: 0.803 (167) | A: 0.197 (41)  | G: 1.000 (116) | A: 0.000 (0)   | G: 0.802 (69)  | A: 0.198 (17) |
| rs4826594  | G: 0.919 (137) | A: 0.081 (12)  | G: 0.539 (82)  | A: 0.461 (70)  | G: 0.916 (207) | A: 0.084 (19)  | G: 0.517 (89)  | A: 0.483 (83) |

**Supplementary Table 5** Independency of association of the new loci by conditional analysis

| Marker     | Reference  | <i>P</i> -value        |                        |
|------------|------------|------------------------|------------------------|
|            |            | GWAS                   | Conditional analysis   |
| rs11125927 | rs721048   | $4.74 \times 10^{-10}$ | $1.02 \times 10^{-09}$ |
| rs73862213 | rs10934853 | $1.71 \times 10^{-10}$ | $1.88 \times 10^{-10}$ |
| rs75777376 | rs12543663 | $6.08 \times 10^{-06}$ | $5.36 \times 10^{-06}$ |
| rs16901814 | rs12543663 | $2.00 \times 10^{-06}$ | $1.91 \times 10^{-06}$ |
| rs4554825  | rs77911174 | $1.06 \times 10^{-07}$ | $2.34 \times 10^{-08}$ |
| rs4826594  | rs5945619  | $8.21 \times 10^{-06}$ | $1.10 \times 10^{-05}$ |

**Supplementary Table 6 Japanese PCa susceptibility SNPs that might be in the same lesions of reported loci.**

|    | SNP ID      | Chr | Position | Effect Allele | NonEffect Allele |             | Case Frequency | Control Frequency | RSQR <sup>a</sup> | OR <sup>b</sup> | 95% CI        | P-value                      | Nearby genes |
|----|-------------|-----|----------|---------------|------------------|-------------|----------------|-------------------|-------------------|-----------------|---------------|------------------------------|--------------|
| 3  | rs114780236 | 2   | 63789049 | G             | A                | GWAS        | 0.848          | 0.826             | 0.989             | 1.166           | (1.098-1.234) | 5.49×10 <sup>-06</sup>       | <i>WDPCP</i> |
|    |             |     |          |               |                  | Replication | 0.853          | 0.829             | -                 | 1.204           | (1.144-1.264) | 4.46×10 <sup>-10</sup>       |              |
|    |             |     |          |               |                  | Meta        | -              | -                 | -                 | 1.187           | -             | <b>1.74×10<sup>-14</sup></b> |              |
| 10 | rs4842687   | 12  | 90156377 | A             | G                | GWAS        | 0.740          | 0.721             | 0.835             | 1.144           | (1.084-1.204) | 7.98×10 <sup>-06</sup>       | -            |
|    |             |     |          |               |                  | Replication | 0.780          | 0.756             | -                 | 1.142           | (1.092-1.192) | 1.70×10 <sup>-07</sup>       |              |
|    |             |     |          |               |                  | Meta        | -              | -                 | -                 | 1.143           | -             | <b>5.61×10<sup>-12</sup></b> |              |

<sup>a</sup>RSQR, imputation accuracy. SNPs were imputed in the GWAS.

<sup>b</sup>Non effect alleles were considered as reference.

**Supplementary Table 7 The validation rate for the SNPs discovered using Asian cohort**

| Original<br>Race | Japanese GWAS   |                 | Concordance<br>Rate |
|------------------|-----------------|-----------------|---------------------|
|                  | <i>P</i> > 0.05 | <i>P</i> < 0.05 |                     |
| European         | 41              | 34              | 0.46                |
| Asian            | 2               | 8               | 0.80                |



**Supplementary Table 8 82 SNPs used for polygenic risk score in Japanese GWAS and replication study**

| SNP ID      | chr | position    | Risk allele | Non-risk allele | OR <sup>a</sup> or DOSE <sup>a</sup> | genotyped/imputed | PRS for replication study | Related or nearby gene |
|-------------|-----|-------------|-------------|-----------------|--------------------------------------|-------------------|---------------------------|------------------------|
| rs7542260   | 1   | 5,743,196   | T           | C               | 1.186                                | imputed           | ○                         | <i>MIR4417</i>         |
| rs1110165   | 1   | 153,913,699 | G           | T               | 1.070                                | genotyped         | X                         | <i>DENND4B</i>         |
| rs4245739   | 1   | 204,518,842 | A           | C               | 1.154                                | genotyped         | ○                         | <i>MDM4</i>            |
| rs62106670  | 2   | 8,597,123   | T           | C               | 1.103                                | imputed           | X                         | <i>LINC00299</i>       |
| rs13385191  | 2   | 20,888,265  | G           | A               | 1.106                                | genotyped         | ○                         | <i>C2orf43</i>         |
| rs1465618   | 2   | 43,553,949  | T           | C               | 1.137                                | genotyped         | ○                         | <i>THADA</i>           |
| rs11125927  | 2   | 62,752,975  | G           | A               | 1.163                                | imputed           | ○                         | <i>RPL21P37</i>        |
| rs114780236 | 2   | 63,789,049  | G           | A               | 1.187                                | imputed           | ○                         | <i>WDPCP</i>           |
| rs10187424  | 2   | 85,794,297  | T           | C               | 1.083                                | genotyped         | ○                         | <i>GGCX</i>            |
| rs11691517  | 2   | 111,893,096 | T           | G               | 1.085                                | imputed           | X                         | <i>BCL2L11</i>         |
| rs12621278  | 2   | 173,311,553 | A           | G               | 1.182                                | genotyped         | ○                         | <i>ITGA6</i>           |
| rs34925593  | 2   | 174,234,547 | C           | T               | 1.081                                | imputed           | X                         | <i>CDCA7</i>           |
| rs2349070   | 2   | 202,130,308 | C           | A               | 1.056                                | imputed           | X                         | <i>CASP8</i>           |
| rs2292884   | 2   | 238,443,226 | G           | A               | 1.062                                | genotyped         | ○                         | <i>MLPH</i>            |
| rs2660753   | 3   | 87,110,674  | T           | C               | 1.178                                | genotyped         | ○                         | <i>VGLL3</i>           |
| rs2055109   | 3   | 87,467,332  | C           | T               | 1.195                                | imputed           | ○                         | <i>FOU1F1</i>          |
| rs7611694   | 3   | 113,275,624 | A           | C               | 1.073                                | imputed           | ○                         | <i>SIDT1</i>           |
| rs73862213  | 3   | 128,217,499 | G           | A               | 1.314                                | imputed           | ○                         | <i>LOC100506995</i>    |
| rs6763931   | 3   | 141,102,833 | A           | G               | 1.052                                | genotyped         | ○                         | <i>ZBTB38</i>          |
| rs12500426  | 4   | 95,514,609  | A           | C               | 1.051                                | genotyped         | ○                         | <i>PDLIM5</i>          |
| rs2242652   | 5   | 1,280,028   | G           | A               | 1.146                                | imputed           | ○                         | <i>TERT</i>            |
| rs12653946  | 5   | 1,895,829   | T           | C               | 1.225                                | genotyped         | ○                         | <i>IRX4</i>            |
| rs1983891   | 6   | 41,536,427  | T           | C               | 1.145                                | genotyped         | ○                         | <i>FOXP4</i>           |
| rs4711748   | 6   | 43,694,598  | T           | C               | 1.063                                | imputed           | X                         | <i>LOC100132242</i>    |
| rs9443189   | 6   | 76,495,882  | A           | G               | 1.097                                | imputed           | ○                         | <i>MYO6</i>            |
| rs339331    | 6   | 117,210,052 | T           | C               | 1.222                                | genotyped         | ○                         | <i>RFX6</i>            |
| rs1933488   | 6   | 153,441,079 | A           | G               | 1.068                                | genotyped         | ○                         | <i>RGS17</i>           |
| rs9364554   | 6   | 160,833,664 | T           | C               | 1.053                                | genotyped         | ○                         | <i>SLC22A3</i>         |
| rs12155172  | 7   | 20,994,491  | A           | G               | 1.084                                | genotyped         | ○                         | <i>LINC01162/SP8</i>   |
| rs10486567  | 7   | 27,976,563  | G           | A               | 1.195                                | genotyped         | ○                         | <i>JAZF1</i>           |
| rs17621345  | 7   | 40,875,192  | A           | C               | 1.245                                | genotyped         | X                         | <i>C7orf10</i>         |
| rs2928679   | 8   | 23,438,975  | A           | G               | 1.124                                | genotyped         | ○                         | <i>NKX3.1</i>          |
| rs1512268   | 8   | 23,526,463  | T           | C               | 1.129                                | genotyped         | ○                         | <i>NKX3.1</i>          |
| rs75777376  | 8   | 127,796,183 | C           | T               | 1.325                                | imputed           | ○                         | <i>FAM84B</i>          |
| rs16901814  | 8   | 127,881,952 | G           | A               | 1.167                                | genotyped         | ○                         | <i>SRRM1P1</i>         |

|            |    |             |   |   |       |           |   |                      |
|------------|----|-------------|---|---|-------|-----------|---|----------------------|
| rs10086908 | 8  | 128,011,937 | T | C | 1.269 | genotyped | ○ | 8q24(Block1)         |
| rs16901979 | 8  | 128,124,916 | A | C | 1.429 | imputed   | ○ | PRNCR1/8q24(Region2) |
| rs620861   | 8  | 128,335,673 | G | A | 1.061 | imputed   | ○ | 8q24(Block3/Region3) |
| rs6983267  | 8  | 128,413,305 | G | T | 1.156 | genotyped | ○ | 8q24(Block4/Region3) |
| rs1447295  | 8  | 128,485,038 | A | C | 1.506 | genotyped | ○ | CASC6                |
| rs7837688  | 8  | 128,539,360 | T | G | 1.727 | genotyped | ○ | 8q24(Block5/Region1) |
| rs1182     | 9  | 132,576,060 | A | C | 1.063 | imputed   | X | TOR1A                |
| rs10993994 | 10 | 51,549,496  | T | C | 1.164 | genotyped | ○ | MSMB                 |
| rs4554825  | 10 | 80,244,623  | C | T | 1.142 | genotyped | ○ | LOC100130698         |
| rs77911174 | 10 | 80,826,833  | G | A | 1.164 | imputed   | ○ | LOC283050            |
| rs1935581  | 10 | 90,195,149  | C | T | 1.060 | imputed   | X | RNLS                 |
| rs7094871  | 10 | 114,712,154 | G | C | 1.078 | imputed   | X | TCF7L2               |
| rs2252004  | 10 | 122,844,709 | C | A | 1.151 | imputed   | ○ | FGFR2/WDR11          |
| rs61890184 | 11 | 7,547,587   | A | G | 1.148 | imputed   | X | PPFIBP2              |
| rs1938781  | 11 | 58,915,110  | G | A | 1.116 | imputed   | ○ | FAM111A              |
| rs7931342  | 11 | 68,994,497  | G | T | 1.065 | genotyped | ○ | MYEOV/TPCN2          |
| rs17245270 | 11 | 76,157,489  | A | C | 1.115 | imputed   | X | C11orf30             |
| rs11055034 | 12 | 12,890,626  | C | A | 1.118 | genotyped | ○ | APOLD1               |
| rs902774   | 12 | 53,273,904  | T | C | 1.142 | genotyped | ○ | KRT78/KRT8           |
| rs7968403  | 12 | 65,012,824  | T | C | 1.103 | imputed   | X | RASSF3               |
| rs4842687  | 12 | 90,156,377  | A | G | 1.143 | imputed   | ○ | MRPL2P1              |
| rs1270884  | 12 | 114,685,571 | A | G | 1.093 | imputed   | ○ | TBX5/RBM19           |
| rs7295014  | 12 | 133,067,989 | G | A | 1.125 | imputed   | X | FBRSL1               |
| rs9600079  | 13 | 73,728,139  | T | G | 1.145 | genotyped | ○ | KLF5                 |
| rs11629412 | 14 | 37,138,294  | C | G | 1.088 | imputed   | X | PAX9                 |
| rs7153648  | 14 | 61,122,526  | C | G | 1.072 | imputed   | ○ | SIX1                 |
| rs58262369 | 14 | 64,693,912  | T | C | 1.203 | imputed   | ○ | ESR2                 |
| rs8014671  | 14 | 71,092,256  | G | A | 1.084 | genotyped | ○ | TTC9                 |
| rs4924487  | 15 | 40,922,915  | C | G | 1.057 | imputed   | X | CASC5                |
| rs8023793  | 15 | 66,942,093  | A | C | 1.198 | imputed   | ○ | SMAD6                |
| rs684232   | 17 | 618,965     | C | T | 1.077 | genotyped | ○ | VPS53                |
| rs11649743 | 17 | 36,074,979  | G | A | 1.147 | genotyped | ○ | HNF1B                |
| rs4430796  | 17 | 36,098,040  | A | G | 1.365 | genotyped | ○ | HNF1B                |
| rs8093601  | 18 | 51,772,473  | C | G | 1.064 | imputed   | X | MBD2                 |
| rs12956892 | 18 | 56,746,315  | T | G | 1.059 | imputed   | X | LOC390858            |
| rs10460109 | 18 | 73,036,165  | T | C | 1.059 | imputed   | X | TSHZ1                |
| rs8102476  | 19 | 38,735,613  | C | T | 1.069 | genotyped | ○ | DPF1/PPP1R14A        |
| rs2659124  | 19 | 51,354,597  | T | A | 1.156 | imputed   | ○ | KLK3                 |

|            |    |            |   |   |       |           |   |                     |
|------------|----|------------|---|---|-------|-----------|---|---------------------|
| rs2735839  | 19 | 51,364,623 | G | A | 1.163 | genotyped | ○ | <i>KLK3/KLK2</i>    |
| rs6117562  | 20 | 753,310    | A | G | 1.093 | imputed   | ○ | <i>C20orf54</i>     |
| rs12480328 | 20 | 49,527,922 | T | C | 1.221 | imputed   | ○ | <i>ADNP</i>         |
| rs6062509  | 20 | 62,362,563 | T | G | 1.122 | imputed   | ○ | <i>ZGPAT</i>        |
| rs138708   | 22 | 39,138,332 | G | A | 1.198 | genotyped | ○ | <i>SUN2</i>         |
| rs5759167  | 22 | 43,500,212 | G | T | 1.062 | genotyped | ○ | <i>TTL1/BIK</i>     |
| rs2405942  | X  | 9,814,135  | A | G | 1.080 | imputed   | ○ | <i>SHROOM2</i>      |
| rs4826594  | X  | 54,454,406 | A | G | 1.069 | imputed   | ○ | <i>TSR2</i>         |
| rs4844289  | X  | 70,407,983 | G | A | 1.051 | imputed   | ○ | <i>NLGN3/BCYRN1</i> |

<sup>a</sup> Non-risk alleles were considered as reference.
