# Supplementary material for: 12 new susceptibility loci for prostate cancer identified by genome-wide association study in Japanese population
Source: PubMed Central journal article supplement (PMC6764957; doi:10.1038/s41467-019-12267-6), 2019-09-27
Supplement: 41467_2019_12267_MOESM3_ESM.pdf [file 41467_2019_12267_MOESM3_ESM.pdf]

## Description of Additional Supplementary Files

File Name: Supplementary Data 1

Description: Association of the reported SNPs in Japanese population
