# Supplementary material for: 12 new susceptibility loci for prostate cancer identified by genome-wide association study in Japanese population
Source: PubMed Central journal article supplement (PMC6764957; doi:10.1038/s41467-019-12267-6), 2019-09-27
Supplement: 41467_2019_12267_MOESM4_ESM.pdf [file 41467_2019_12267_MOESM4_ESM.pdf]

**Supplementary Data 1 Association of the reported SNPs in Japanese population**

| SNP ID                  | Chr | Position  | EffectAllele | NonEffectAllele | CASE_FREQ1 | CTRL_FREQ1 | RSQR        | OR    | PVALUE    | Gene               | Original SNP |
|-------------------------|-----|-----------|--------------|-----------------|------------|------------|-------------|-------|-----------|--------------------|--------------|
| rs636291                | 1   | 10556097  | A            | G               | 0.735      | 0.738      | 0.990       | 0.998 | 9.48.E-01 | <i>PEX14</i>       |              |
| rs12139208 <sup>c</sup> | 1   | 88213014  | T            | C               | 0.756      | 0.767      | 1.000       | 0.971 | 2.95.E-01 | LOC100505768       | rs56391074   |
| rs17599629              | 1   | 150658287 | A            | G               | 0.819      | 0.829      | 1.000       | 0.949 | 9.56.E-02 | <i>GOLPH3L</i>     |              |
| rs1110165 <sup>c</sup>  | 1   | 153913699 | T            | G               | 0.658      | 0.675      | 1.000       | 0.935 | 9.33.E-03 | DENND4B            | rs34579442   |
| rs1218582               | 1   | 154834183 | G            | A               | 0.934      | 0.931      | 0.940       | 1.078 | 1.39.E-01 | <i>KCNN3</i>       |              |
| rs4245739               | 1   | 204518842 | A            | C               | 0.964      | 0.959      | 1.000       | 1.154 | 2.73.E-02 | <i>MDM4</i>        |              |
| rs1775148               | 1   | 205757824 | C            | T               | 0.526      | 0.514      | 0.928       | 1.046 | 7.72.E-02 | <i>SLC41A1 3'</i>  |              |
| rs62106670              | 2   | 8597123   | C            | T               | 0.904      | 0.910      | 0.779       | 0.906 | 3.82.E-02 | LINC00299          |              |
| rs11902236              | 2   | 10117868  | C            | T               | 0.886      | 0.892      | 1.000       | 0.951 | 1.97.E-01 | <i>GRHL1</i>       |              |
| rs9287719               | 2   | 10710730  | T            | C               | 0.579      | 0.593      | 0.995       | 0.953 | 5.08.E-02 | <i>NOL10</i>       |              |
| rs13385191              | 2   | 20888265  | G            | A               | 0.589      | 0.571      | 1.000       | 1.106 | 4.87.E-05 | <i>C2orf43</i>     |              |
| rs1465618               | 2   | 43553949  | T            | C               | 0.676      | 0.647      | 0.959       | 1.137 | 1.15.E-06 | <i>THADA</i>       |              |
| rs721048                | 2   | 63131731  | G            | A               | 0.953      | 0.955      | 1.000       | 0.936 | 2.58.E-01 | <i>EHP1</i>        |              |
| rs74702681              | 2   | 66652635  | C            | T               |            |            | Monoallele  |       |           | MEIS1-AS3          |              |
| rs10187424              | 2   | 85794297  | T            | C               | 0.650      | 0.634      | 1.000       | 1.083 | 1.60.E-03 | <i>GGCX</i>        |              |
| rs11691517              | 2   | 111893096 | T            | G               | 0.810      | 0.803      | 0.7501      | 1.085 | 2.17.E-02 | BCL2L11            |              |
| rs12621278              | 2   | 173311553 | A            | G               | 0.802      | 0.777      | 0.996       | 1.182 | 3.20.E-08 | <i>ITGA6</i>       |              |
| rs34925593              | 2   | 174234547 | T            | C               | 0.562      | 0.579      | 0.9519      | 0.925 | 1.93.E-03 | CDCA7              |              |
| rs2349070 <sup>c</sup>  | 2   | 202130308 | C            | A               | 0.690      | 0.675      | 0.9903      | 1.056 | 4.02.E-02 | CASP8              | rs59308963   |
| rs2292884               | 2   | 238443226 | A            | G               | 0.735      | 0.750      | 1.000       | 0.941 | 2.85.E-02 | <i>MLPH</i>        |              |
| rs3771570               | 2   | 242382864 | C            | T               | 0.899      | 0.897      | 0.917       | 1.036 | 4.02.E-01 | <i>FARP2</i>       |              |
| rs2660753               | 3   | 87110674  | C            | T               | 0.703      | 0.741      | 0.999       | 0.849 | 1.25.E-09 | <i>VGLL3</i>       |              |
| rs2055109               | 3   | 87467332  | T            | C               | 0.875      | 0.893      | 0.885       | 0.837 | 8.97.E-06 | <i>FOU1F1 5'</i>   |              |
| rs1283104               | 3   | 106962521 | C            | G               | 0.590      | 0.604      | 0.9998      | 0.959 | 8.63.E-02 | LOC344595          |              |
| rs7611694               | 3   | 113275624 | C            | A               | 0.788      | 0.804      | 1.000       | 0.932 | 2.04.E-02 | <i>SIDT1</i>       |              |
| rs10934853              | 3   | 128038373 | C            | A               | 0.492      | 0.484      | 1.000       | 1.006 | 8.10.E-01 | <i>EEFSEC</i>      |              |
| rs6763931               | 3   | 141102833 | G            | A               | 0.631      | 0.642      | 0.999       | 0.951 | 4.61.E-02 | <i>ZBTB38</i>      |              |
| rs182314334             | 3   | 152003952 | T            | C               |            |            | Monoallele  |       |           | MBNL1              |              |
| rs142436749             | 3   | 169092850 | A            | G               |            |            | Monoallele  |       |           | MECOM              |              |
| rs10936632              | 3   | 170130102 | C            | A               | 0.631      | 0.628      | 0.945       | 0.954 | 6.79.E-02 | <i>SKIL/CLDN11</i> |              |
| rs78943174              | 3   | 175252736 | C            | T               |            |            | Mono allele |       |           | NAALADL2           |              |
| rs10009409              | 4   | 73855253  | T            | C               | 0.564      | 0.556      | 0.973       | 1.034 | 1.85.E-01 | <i>COX18</i>       |              |
| rs1894292               | 4   | 74349158  | G            | A               | 0.680      | 0.676      | 0.858       | 1.031 | 2.75.E-01 | <i>AFM</i>         |              |
| rs12500426              | 4   | 95514609  | C            | A               | 0.546      | 0.562      | 0.992       | 0.951 | 4.35.E-02 | <i>PDLIM5</i>      |              |
| rs17021918              | 4   | 95562877  | C            | T               | 0.631      | 0.622      | 0.999       | 1.014 | 5.91.E-01 | <i>PDLIM5</i>      |              |
| rs7679673               | 4   | 106061534 | A            | C               | 0.794      | 0.805      | 0.987       | 0.955 | 1.30.E-01 | <i>TET2</i>        |              |
| rs2242652               | 5   | 1280028   | G            | A               | 0.787      | 0.756      | 0.940       | 1.146 | 7.78.E-06 | <i>TERT</i>        |              |
| rs12653946              | 5   | 1895829   | C            | T               | 0.503      | 0.555      | 0.999       | 0.816 | 1.16.E-16 | <i>IRX4</i>        |              |
| rs2121875               | 5   | 44365545  | C            | A               | 0.504      | 0.495      | 1.000       | 1.020 | 4.22.E-01 | <i>FGF10</i>       |              |

|                          |   |           |   |   |       |       |            |       |           |                                  |           |
|--------------------------|---|-----------|---|---|-------|-------|------------|-------|-----------|----------------------------------|-----------|
| rs35148638               | 5 | 86610989  | A | C | 0.679 | 0.676 | 1.000      | 1.040 | 1.38.E-01 | RASA1                            |           |
| rs10793821               | 5 | 133836209 | T | C | 0.722 | 0.712 | 0.707      | 1.054 | 1.02.E-01 | PHF15                            |           |
| rs76551843               | 5 | 169171883 | A | G |       |       | Monoallele |       |           | DOCK2                            |           |
| rs6869841                | 5 | 172939426 | C | T | 0.829 | 0.830 | 0.999      | 1.021 | 5.20.E-01 | STC2/BOD1                        |           |
| rs4976790                | 5 | 177968915 | G | T | 0.939 | 0.935 | 1.000      | 1.073 | 1.62.E-01 | COL23A1                          |           |
| rs4713266                | 6 | 11219030  | T | C | 0.762 | 0.771 | 0.977      | 0.949 | 7.49.E-02 | NEDD9                            |           |
| rs115457135              | 6 | 30073776  | G | A | 0.691 | 0.691 | 0.000      | 0.000 | 6.70.E-01 | TRIM31                           |           |
| rs12665339               | 6 | 30600982  | A | G |       |       | No data    |       |           | ATAT1                            |           |
| rs1966 <sup>c</sup>      | 6 | 31107733  | C | T | 0.656 | 0.640 | 1.000      | 1.010 | 7.12.E-01 | CCHCR1                           | rs130067  |
| rs114376585 <sup>c</sup> | 6 | 32192331  | G | A | 0.858 | 0.855 | 0.092      | 1.129 | 2.88.E-01 | NOTCH4                           | rs3096702 |
| rs115306967              | 6 | 32400939  | G | C | 0.789 | 0.789 | 0.000      | 0.004 | 6.69.E-02 | HLA-DRB6                         |           |
| rs9296068                | 6 | 32988445  | T | G |       |       | No data    |       |           |                                  |           |
| rs9469899                | 6 | 34793124  | G | A | 0.667 | 0.666 | 0.987      | 0.973 | 2.98.E-01 | UHRF1BP1                         |           |
| rs1983891                | 6 | 41536427  | C | T | 0.555 | 0.581 | 0.998      | 0.873 | 4.53.E-08 | FOXP4                            |           |
| rs4711748                | 6 | 43694598  | T | C | 0.541 | 0.532 | 0.958      | 1.063 | 1.42.E-02 | LOC100132242                     |           |
| rs9443189                | 6 | 76495882  | A | G | 0.698 | 0.679 | 0.998      | 1.097 | 4.68.E-04 | MYO6                             |           |
| rs2273669                | 6 | 109285189 | A | G | 0.919 | 0.924 | 0.944      | 0.926 | 1.01.E-01 | ARMC2                            |           |
| rs339331                 | 6 | 117210052 | T | C | 0.680 | 0.631 | 1.000      | 1.222 | 8.66.E-15 | RFX6                             |           |
| rs1933488                | 6 | 153441079 | G | A | 0.796 | 0.804 | 1.000      | 0.937 | 3.19.E-02 | RGS17                            |           |
| rs4646284                | 6 | 160581543 | - | G |       |       | No data    |       |           | SLC22A1/SLC22A3                  |           |
| rs9364554                | 6 | 160833664 | C | T | 0.659 | 0.672 | 1.000      | 0.950 | 4.49.E-02 | SLC22A3                          |           |
| rs138004030              | 6 | 170475879 | G | A | 0.848 | 0.849 | 0.072      | 0.934 | 5.96.E-01 | LOC100505903                     |           |
| rs527510716              | 7 | 1944287   | G | C |       |       | No data    |       |           | MAD1L1                           |           |
| rs11452686               | 7 | 20413861  | - | A |       |       | No data    |       |           | ITGB8                            |           |
| rs12155172               | 7 | 20994491  | G | A | 0.789 | 0.806 | 0.997      | 0.922 | 7.10.E-03 | LINC01162/SP8                    |           |
| rs10486567               | 7 | 27976563  | A | G | 0.882 | 0.901 | 0.989      | 0.837 | 5.58.E-06 | JAZF1                            |           |
| rs17621345               | 7 | 40875192  | A | C | 0.979 | 0.971 | 1.000      | 1.245 | 6.98.E-03 | C7orf10                          |           |
| rs56232506               | 7 | 47437244  | G | A | 0.696 | 0.698 | 0.927      | 1.029 | 2.95.E-01 | TNS3                             |           |
| rs6465657                | 7 | 97816327  | C | T | 0.899 | 0.895 | 0.999      | 1.054 | 1.83.E-01 | LMTK2                            |           |
| rs2928679                | 8 | 23438975  | G | A | 0.898 | 0.908 | 1.000      | 0.890 | 4.04.E-03 | NKX3.1                           |           |
| rs1512268                | 8 | 23526463  | C | T | 0.575 | 0.630 | 1.000      | 0.776 | 3.26.E-24 | NKX3.1                           |           |
| rs11135910               | 8 | 25892142  | C | T | 0.979 | 0.975 | 1.000      | 1.143 | 1.12.E-01 | EBF2                             |           |
| rs12543663               | 8 | 127924659 | A | C | 0.918 | 0.923 | 0.983      | 0.965 | 4.27.E-01 | PCAT1                            |           |
| rs10086908               | 8 | 128011937 | T | C | 0.833 | 0.797 | 1.000      | 1.269 | 7.47.E-14 | 8q24(Block1)                     |           |
| rs16901979               | 8 | 128124916 | C | A | 0.748 | 0.812 | 0.999      | 0.700 | 3.44.E-34 | <sup>p</sup> RNCR1/8q24(Region2) |           |
| rs620861                 | 8 | 128335673 | G | A | 0.555 | 0.537 | 0.945      | 1.061 | 1.82.E-02 | 8q24(Block3/Region3)             |           |
| rs6983267                | 8 | 128413305 | T | G | 0.627 | 0.666 | 1.000      | 0.865 | 1.22.E-08 | 8q24(Block4/Region3)             |           |
| rs1447295                | 8 | 128485038 | C | A | 0.758 | 0.821 | 0.993      | 0.664 | 4.10.E-42 | CASC6                            |           |
| rs7837688                | 8 | 128539360 | G | T | 0.775 | 0.842 | 0.832      | 0.579 | 2.02.E-58 | 8q24(Block5/Region1)             |           |
| rs1048169                | 9 | 19055965  | T | C | 0.862 | 0.867 | 0.937      | 0.981 | 6.07.E-01 | HAUS6                            |           |
| rs17694493               | 9 | 22041998  | C | G | 0.986 | 0.984 | 0.994      | 1.114 | 2.89.E-01 | CDKN2B-AS1                       |           |
| rs10122495               | 9 | 34049779  | A | T | 0.607 | 0.601 | 0.607      | 0.983 | 6.03.E-01 | UBAP2                            |           |

|                         |    |           |    |      |       |       |             |       |           |                            |            |
|-------------------------|----|-----------|----|------|-------|-------|-------------|-------|-----------|----------------------------|------------|
| rs817826                | 9  | 110156300 | T  | C    | 0.941 | 0.947 | 0.999       | 0.922 | 1.26.E-01 | <i>RAD23B/KLF4</i>         |            |
| rs1571801               | 9  | 124427373 | G  | T    | 0.958 | 0.956 | 0.991       | 1.058 | 3.53.E-01 | <i>DAB2IP</i>              |            |
| rs1182                  | 9  | 132576060 | C  | A    | 0.714 | 0.723 | 0.999       | 0.941 | 2.53.E-02 | <i>TOR1A</i>               |            |
| rs141536087             | 10 | 854442    | -  | CGCA |       |       | No data     |       |           | <i>LARP4B</i>              |            |
| rs76934034              | 10 | 46082985  | T  | C    |       |       | Mono allele |       |           | <i>MARCH8</i>              |            |
| rs10993994              | 10 | 51549496  | C  | T    | 0.510 | 0.545 | 0.998       | 0.859 | 4.60.E-10 | <i>MSMB</i>                |            |
| rs1935581               | 10 | 90195149  | C  | T    | 0.481 | 0.461 | 0.999       | 1.060 | 1.66.E-02 | <i>RNLS</i>                |            |
| rs3850699               | 10 | 104414221 | A  | G    | 0.905 | 0.899 | 1.000       | 1.034 | 4.14.E-01 | <i>TRIM8</i>               |            |
| rs7094871               | 10 | 114712154 | C  | G    | 0.595 | 0.614 | 0.985       | 0.928 | 2.78.E-03 | <i>TCF7L2</i>              |            |
| rs2252004               | 10 | 122844709 | C  | A    | 0.803 | 0.785 | 0.937       | 1.151 | 7.92.E-06 | <i>FGFR2/WDR11</i>         |            |
| rs4962416               | 10 | 126696872 | T  | C    |       |       | Mono allele |       |           | <i>CTBP2</i>               |            |
| rs1881502               | 11 | 1507512   | C  | T    | 0.932 | 0.936 | 0.968       | 0.977 | 6.46.E-01 | <i>MOB2</i>                |            |
| rs7127900               | 11 | 2233574   | G  | A    | 0.904 | 0.909 | 0.999       | 0.949 | 2.10.E-01 | <i>TH/ASCL2</i>            |            |
| rs61890184              | 11 | 7547587   | G  | A    | 0.853 | 0.863 | 0.968       | 0.871 | 9.64.E-05 | <i>PPFIBP2</i>             |            |
| rs547171081             | 11 | 47421713  | GG | -    |       |       | No data     |       |           | <i>MIR4487</i>             |            |
| rs1938781               | 11 | 58915110  | A  | G    | 0.675 | 0.696 | 0.999       | 0.896 | 3.00.E-05 | <i>FAM111A</i>             |            |
| rs2277283               | 11 | 61908440  | T  | C    | 0.923 | 0.923 | 0.983       | 1.002 | 9.73.E-01 | <i>INCENP</i>              |            |
| rs12785905              | 11 | 66951715  | G  | C    |       |       | Monoallele  |       |           | <i>KDM2A</i>               |            |
| rs7931342               | 11 | 68994497  | T  | G    | 0.767 | 0.775 | 1.000       | 0.939 | 3.03.E-02 | <i>MYEOV/TPCN2</i>         |            |
| rs17245270 <sup>c</sup> | 11 | 76157489  | A  | C    | 0.857 | 0.846 | 0.999       | 1.115 | 1.62.E-03 | <i>C11orf30</i>            | rs11290954 |
| rs11568818              | 11 | 102401661 | T  | C    | 0.934 | 0.933 | 1.000       | 1.042 | 3.96.E-01 | <i>MMP7 5'</i>             |            |
| rs1800057               | 11 | 108143456 | C  | G    |       |       | Monoallele  |       |           | <i>ATM</i>                 |            |
| rs11214775              | 11 | 113807181 | G  | A    | 0.707 | 0.697 | 1.000       | 1.022 | 4.18.E-01 | <i>HTR3B</i>               |            |
| rs138466039             | 11 | 125054543 | C  | T    |       |       | Monoallele  |       |           | <i>PKNOX2</i>              |            |
| rs878987                | 11 | 134266372 | A  | G    | 0.962 | 0.965 | 0.678       | 0.884 | 1.14.E-01 | <i>B3GAT1</i>              |            |
| rs2066827               | 12 | 12871099  | T  | G    | 0.974 | 0.974 | 0.859       | 1.041 | 6.25.E-01 | <i>CDKN1B</i>              |            |
| rs10845938              | 12 | 14416918  | G  | A    | 0.692 | 0.695 | 0.776       | 1.010 | 7.31.E-01 | <i>GNAI2P1</i>             |            |
| rs80130819              | 12 | 48419618  | A  | C    |       |       | Mono allele |       |           | <i>RP1-228P16.4/SEN1P1</i> |            |
| rs10875943              | 12 | 49676010  | C  | T    | 0.818 | 0.816 | 0.344       | 1.047 | 4.01.E-01 | <i>TUB1C/LOC101927267</i>  |            |
| rs902774                | 12 | 53273904  | T  | C    | 0.046 | 0.059 | 1.000       | 1.142 | 1.96.E-02 | <i>KRT78/KRT8</i>          |            |
| rs7968403               | 12 | 65012824  | T  | C    | 0.839 | 0.830 | 0.994       | 1.103 | 3.31.E-03 | <i>RASSF3</i>              |            |
| rs5799921               | 12 | 90160281  | -  | A    |       |       | No data     |       |           | <i>LOC107984543</i>        |            |
| rs1270884               | 12 | 114685571 | G  | A    | 0.793 | 0.808 | 0.938       | 0.915 | 4.56.E-03 | <i>TBX5/RBM19</i>          |            |
| rs7295014               | 12 | 133067989 | G  | A    | 0.880 | 0.872 | 0.958       | 1.125 | 1.93.E-03 | <i>FBRSL1</i>              |            |
| rs9600079               | 13 | 73728139  | G  | T    | 0.579 | 0.614 | 0.999       | 0.875 | 7.44.E-08 | <i>KLF5 3'</i>             |            |
| rs1004030               | 14 | 23305649  | T  | C    | 0.656 | 0.653 | 0.988       | 1.007 | 7.75.E-01 | <i>MMP14</i>               |            |
| rs11629412              | 14 | 37138294  | C  | G    | 0.727 | 0.711 | 0.993       | 1.088 | 1.85.E-03 | <i>PAX9</i>                |            |
| rs8008270               | 14 | 53372330  | T  | C    |       |       | Mono allele |       |           | <i>FERMT2</i>              |            |
| rs7153648               | 14 | 61122526  | G  | C    | 0.707 | 0.713 | 0.958       | 0.933 | 1.07.E-02 | <i>SIX1 10 kb 5'</i>       |            |
| rs58262369              | 14 | 64693912  | C  | T    | 0.921 | 0.934 | 0.993       | 0.831 | 7.16.E-05 | <i>ESR2</i>                |            |
| rs7141529               | 14 | 69126744  | C  | T    | 0.858 | 0.858 | 1.000       | 1.010 | 7.80.E-01 | <i>RAD51B</i>              |            |
| rs8014671               | 14 | 71092256  | A  | G    | 0.631 | 0.650 | 1.000       | 0.922 | 1.34.E-03 | <i>TTC9 16 kb 5'</i>       |            |

|                        |    |          |   |   |       |       |             |       |           |                 |           |
|------------------------|----|----------|---|---|-------|-------|-------------|-------|-----------|-----------------|-----------|
| rs4924487              | 15 | 40922915 | G | C | 0.688 | 0.702 | 0.999       | 0.946 | 3.59.E-02 | CASC5           |           |
| rs33984059             | 15 | 56385618 | A | G |       |       | Monoallele  |       |           | RFX7            |           |
| rs112293876            | 15 | 66764392 | A | - |       |       | No data     |       |           | MAP2K1          |           |
| rs11863709             | 16 | 57654326 | C | T |       |       | Monoallele  |       |           | ADGRG1          |           |
| rs12051443             | 16 | 71691329 | A | G | 0.673 | 0.670 | 0.980       | 1.026 | 3.35.E-01 | PHLPP2          |           |
| rs201158093            | 16 | 82178644 | A | - |       |       | No data     |       |           |                 |           |
| rs684232               | 17 | 618965   | C | T | 0.508 | 0.489 | 1.000       | 1.077 | 2.20.E-03 | VPS53           |           |
| rs28441558             | 17 | 7802868  | T | C |       |       | No data     |       |           | CHD3            |           |
| rs142444269            | 17 | 30098749 | T | C | 0.704 | 0.714 | 0.923       | 0.955 | 9.69.E-02 | LOC100420482    |           |
| rs11649743             | 17 | 36074979 | G | A | 0.732 | 0.703 | 0.992       | 1.147 | 5.82.E-07 | HNFB            |           |
| rs4430796              | 17 | 36098040 | A | G | 0.706 | 0.648 | 0.859       | 1.365 | 5.49.E-27 | HNFB            |           |
| rs2680708              | 17 | 56456120 | G | A | 0.603 | 0.602 | 0.965       | 1.015 | 5.47.E-01 | RNF43           |           |
| rs1859962              | 17 | 69108753 | T | G | 0.973 | 0.974 | 0.022       | 1.219 | 7.04.E-01 | CASC17          |           |
| rs8093601              | 18 | 51772473 | C | G | 0.792 | 0.780 | 0.999       | 1.064 | 3.86.E-02 | MBD2            |           |
| rs28607662             | 18 | 53230609 | T | C |       |       | Monoallele  |       |           | TCF4            |           |
| rs12956892             | 18 | 56746315 | G | T | 0.472 | 0.483 | 0.990       | 0.945 | 2.21.E-02 | LOC390858       |           |
| rs533722308            | 18 | 60960944 | - | T |       |       | No data     |       |           | BCL2            |           |
| rs10460109             | 18 | 73036165 | C | T | 0.643 | 0.654 | 0.997       | 0.944 | 2.52.E-02 | TSHZ1           |           |
| rs7241993              | 18 | 76773973 | C | T | 0.635 | 0.627 | 0.999       | 1.027 | 2.89.E-01 | SALL3/ATP9B     |           |
| rs11666569             | 19 | 17214073 | C | T | 0.679 | 0.665 | 0.999       | 1.052 | 5.35.E-02 | MYO9B           |           |
| rs118005503            | 19 | 32167803 | G | C | 0.971 | 0.964 | 0.811       | 1.163 | 5.70.E-02 | LOC100507550    |           |
| rs8102476              | 19 | 38735613 | T | C | 0.606 | 0.627 | 0.999       | 0.935 | 7.28.E-03 | DPF1/PPP1R14A   |           |
| rs11672691             | 19 | 41985587 | G | A | 0.509 | 0.509 | 0.920       | 1.020 | 4.33.E-01 | PCAT19          |           |
| rs61088131             | 19 | 42700947 | T | C | 0.841 | 0.839 | 0.762       | 1.026 | 5.03.E-01 | DEDD2           |           |
| rs2659124              | 19 | 51354597 | T | A | 0.641 | 0.605 | 0.972       | 1.156 | 1.69.E-08 | KLK3            |           |
| rs2735839              | 19 | 51364623 | G | A | 0.639 | 0.600 | 0.992       | 1.163 | 2.85.E-09 | KLK3/KLK2 (PSA) |           |
| rs103294               | 19 | 54797848 | T | C | 0.752 | 0.746 | 0.998       | 1.005 | 8.67.E-01 | LILRA3          |           |
| rs11480453             | 20 | 31347263 | - | A |       |       | No data     |       |           |                 |           |
| rs12480328             | 20 | 49527922 | T | C | 0.947 | 0.939 | 0.989       | 1.221 | 1.88.E-04 | ADNP            |           |
| rs6068688 <sup>c</sup> | 20 | 52456926 | A | T | 0.598 | 0.606 | 0.999       | 0.967 | 1.81.E-01 | SUMO1P1         | rs6091758 |
| rs2427345              | 20 | 61015611 | C | T | 0.793 | 0.790 | 1.000       | 1.007 | 8.20.E-01 | GATA5/RBBP8NL   |           |
| rs6062509              | 20 | 62362563 | G | T | 0.594 | 0.611 | 0.998       | 0.891 | 3.86.E-06 | ZGPAT           |           |
| rs1041449              | 21 | 42901421 | A | G | 0.884 | 0.885 | 0.923       | 1.003 | 9.39.E-01 | TMPRSS2         |           |
| rs2238776              | 22 | 19757892 | G | A | 0.586 | 0.583 | 0.733       | 1.051 | 8.94.E-02 | TBX1            |           |
| rs9625483              | 22 | 28888689 | G | A |       |       | Monoallele  |       |           | TTC28           |           |
| rs58133635             | 22 | 40471188 | C | T | 0.949 | 0.953 | 0.655       | 0.903 | 1.39.E-01 | TNRC6B          |           |
| rs5759167              | 22 | 43500212 | G | T | 0.678 | 0.660 | 0.999       | 1.062 | 1.90.E-02 | TLL1/BIK        |           |
| rs2405942              | X  | 9814135  | A | G | 0.891 | 0.870 | 0.998       | 1.080 | 4.99.E-03 | SHROOM2         |           |
| rs17321482             | X  | 11482384 | C | T |       |       | Monoallele  |       |           | ARHGAP6         |           |
| rs5945619              | X  | 51241672 | T | C | 0.904 | 0.913 | 0.995       | 0.955 | 1.20.E-01 | NUDT10/NUDT11   |           |
| rs2807031              | X  | 52896949 | T | C | 0.970 | 0.970 | 0.818       | 1.013 | 8.23.E-01 | XAGE3           |           |
| rs5919432              | X  | 67021550 | C | T |       |       | Mono allele |       |           | AR 3'           |           |

|           |   |          |   |   |       |       |       |       |           |                     |
|-----------|---|----------|---|---|-------|-------|-------|-------|-----------|---------------------|
| rs6625711 | X | 70139850 | A | T | 0.464 | 0.451 | 0.877 | 1.025 | 1.90.E-01 | <i>SLC7A/TEX11</i>  |
| rs4844289 | X | 70407983 | G | A | 0.750 | 0.735 | 0.981 | 1.051 | 1.23.E-02 | <i>NLGN3/BCYRN1</i> |

---

<sup>a</sup>RSQR, imputation accuracy. SNPs were imputed in the GWAS.

<sup>b</sup>Non effect alleles were considered as reference.

<sup>c</sup>Original SNP was not contained the GWAS data. Each SNP indicated strong association ( $r^2 \geq 0.8$ ) with original SNPs in the Japanese population in 1,000 genomes data.
